# Supplementary material for: Comparing Simplification Strategies for the Skeletal Muscle Proteome
Source: MDPI journal article supplement (doi:10.3390/proteomes4010010), 2016-03-02
Supplement: s1 [file s1]

# Supplementary Materials: Comparing Simplification Strategies for the Skeletal Muscle Proteome

Bethany Geary, Iain S. Young, Philip Cash, Phillip D. Whitfield, Mary K. Doherty

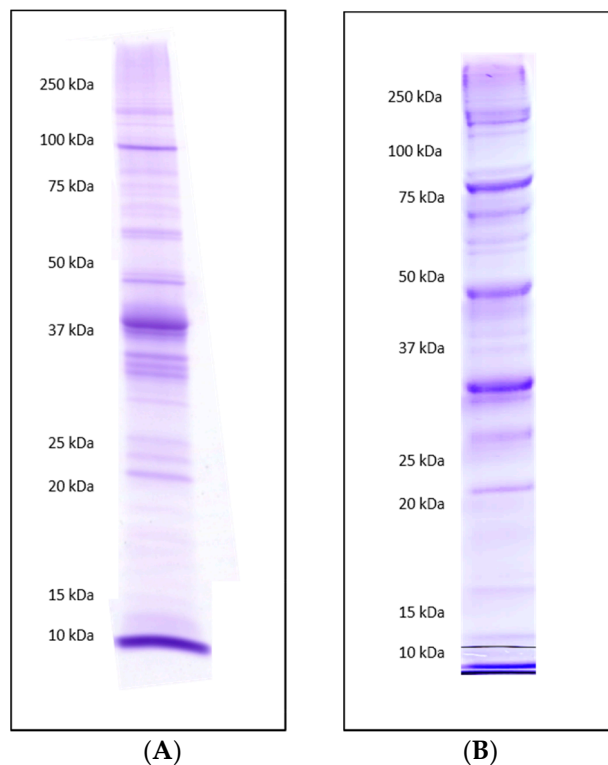

**Figure S1.** Visualisation of ProteoMiner Bead Equalisation. Proteins were subjected to equalisation using bead technology in order to reduce the dominance of highly abundant proteins. Panel **A** shows the pre-fractionated skeletal muscle soluble proteome with the simplified proteome in Panel **B**.

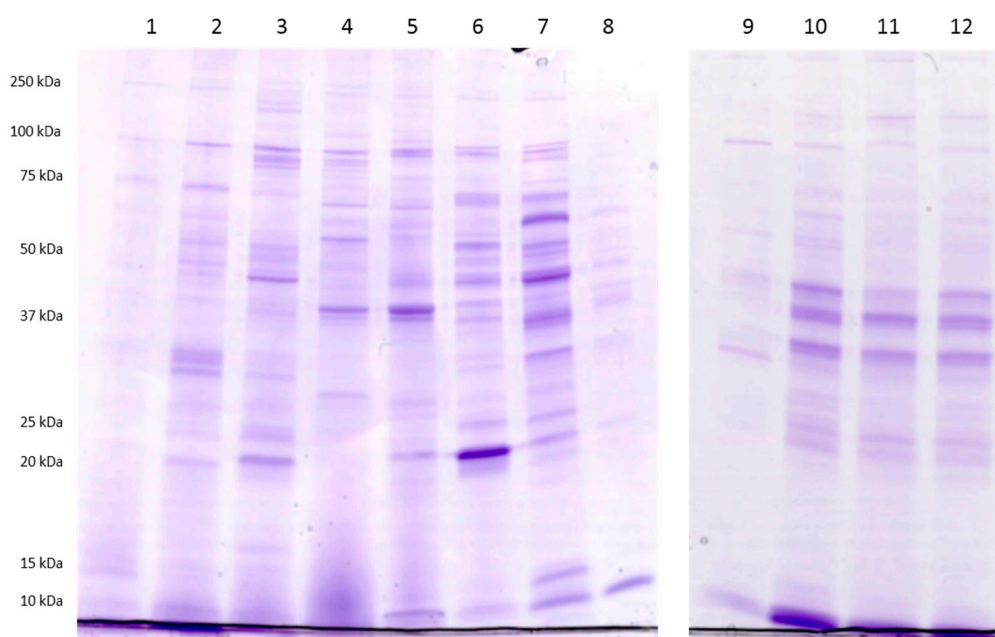

**Figure S2.** In-Solution Isoelectric Focussing of the Skeletal Muscle Proteome. Proteins were separated according to isoelectric point and each fraction further separated by 1D-SDS-PAGE.

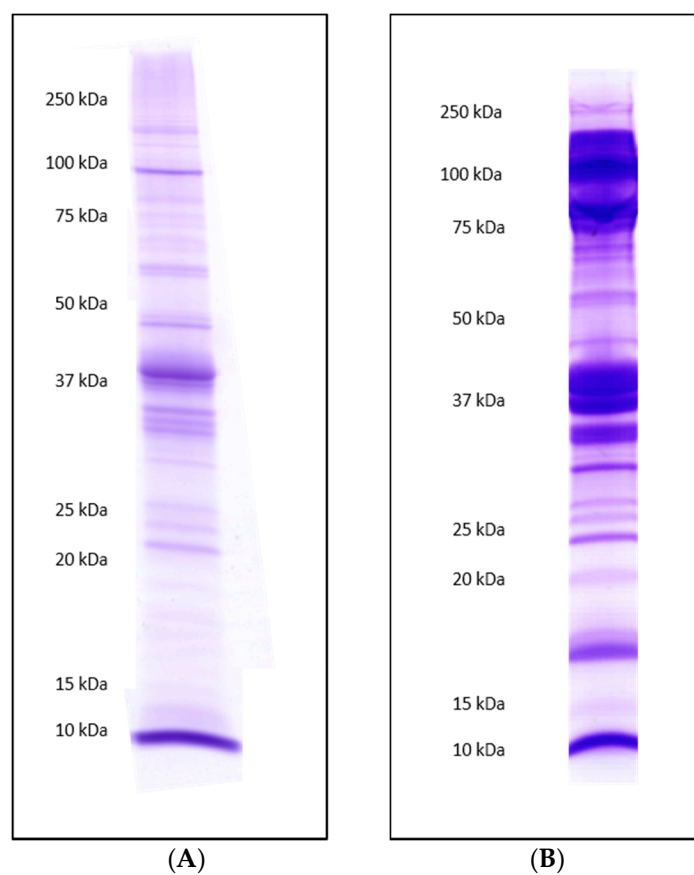

**Figure S3.** Protein Extraction for FASP Analysis. Proteins were solubilised prior to FASP analysis. Panel **A** shows the skeletal muscle soluble proteome used for standard 1D-SDS-PAGE with the extracted proteome for FASP analysis shown in Panel **B**.
